# Supplementary material for: Cu2ZnSnS4/MoS2-Reduced Graphene Oxide Heterostructure: Nanoscale Interfacial Contact and Enhanced Photocatalytic Hydrogen Generation
Source: PubMed Central journal article supplement (PMC5206717; doi:10.1038/srep39411), 2017-01-03
Supplement: srep39411-s1.pdf [file srep39411-s1.pdf]

Supporting Information

# **Cu<sub>2</sub>ZnSnS<sub>4</sub>/MoS<sub>2</sub>-Reduced Graphene Oxide Heterostructure: Nanoscale Interfacial Contact and Enhanced Photocatalytic Hydrogen Generation**

**Enna Ha,<sup>1</sup> Wei Liu,<sup>1</sup> Luyang Wang,<sup>1</sup> Ho-Wing Man,<sup>1</sup> Liangsheng Hu,<sup>1</sup> Shik Chi Edman Tsang,<sup>2</sup> Chris Tsz-Leung Chan,<sup>1</sup> Wai-Ming Kwok,<sup>1</sup> Lawrence Yoon Suk Lee,<sup>1,\*</sup> and Kwok-Yin Wong<sup>1,\*</sup>**

<sup>1</sup>Department of Applied Biology and Chemical Technology and the State Key Laboratory of Chirosciences, The Hong Kong Polytechnic University, Hung Hom, Kowloon, Hong Kong SAR, China.

<sup>2</sup>Wolfson Catalysis Centre, Department of Chemistry, University of Oxford, Oxford, OX1 3QR, UK.

\*E-mail: lawrence.ys.lee@polyu.edu.hk; kwok-yin.wong@polyu.edu.hk;

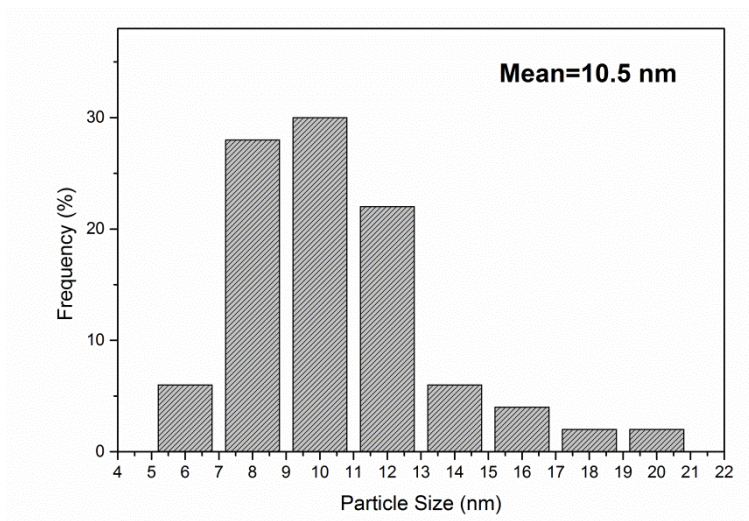

**Figure S1** The size distribution histogram of CZTS nanoparticles calculated from TEM images.

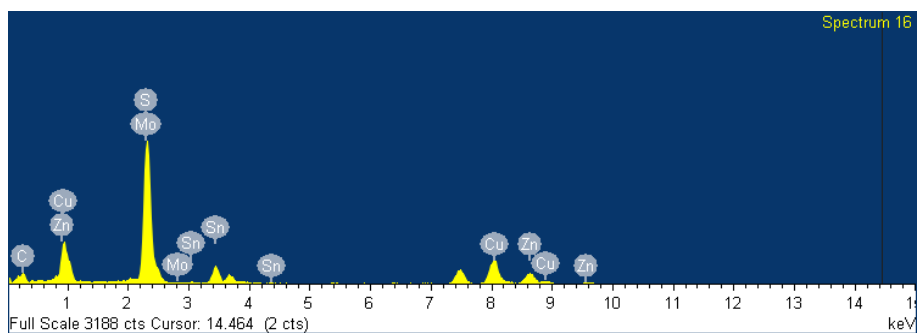

**Figure S2** EDS spectrum of CZTS/MoS<sub>2</sub>-rGO heterostructure.

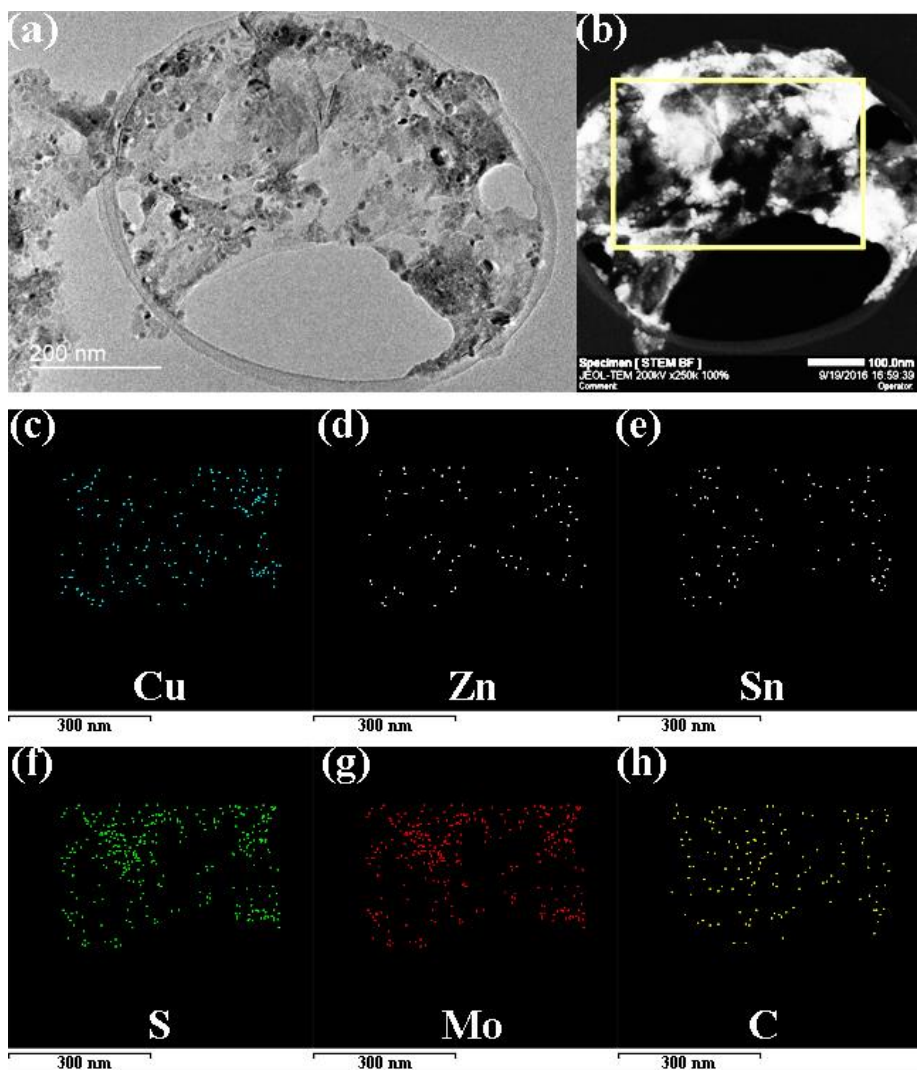

**Figure S3** (a) TEM and (b) STEM images of CZTS/MoS<sub>2</sub>-rGO and the corresponding EDS elemental mapping images for (c) Cu, (d) Zn, (e) Sn, (f) S, (g) Mo, and (h) C.

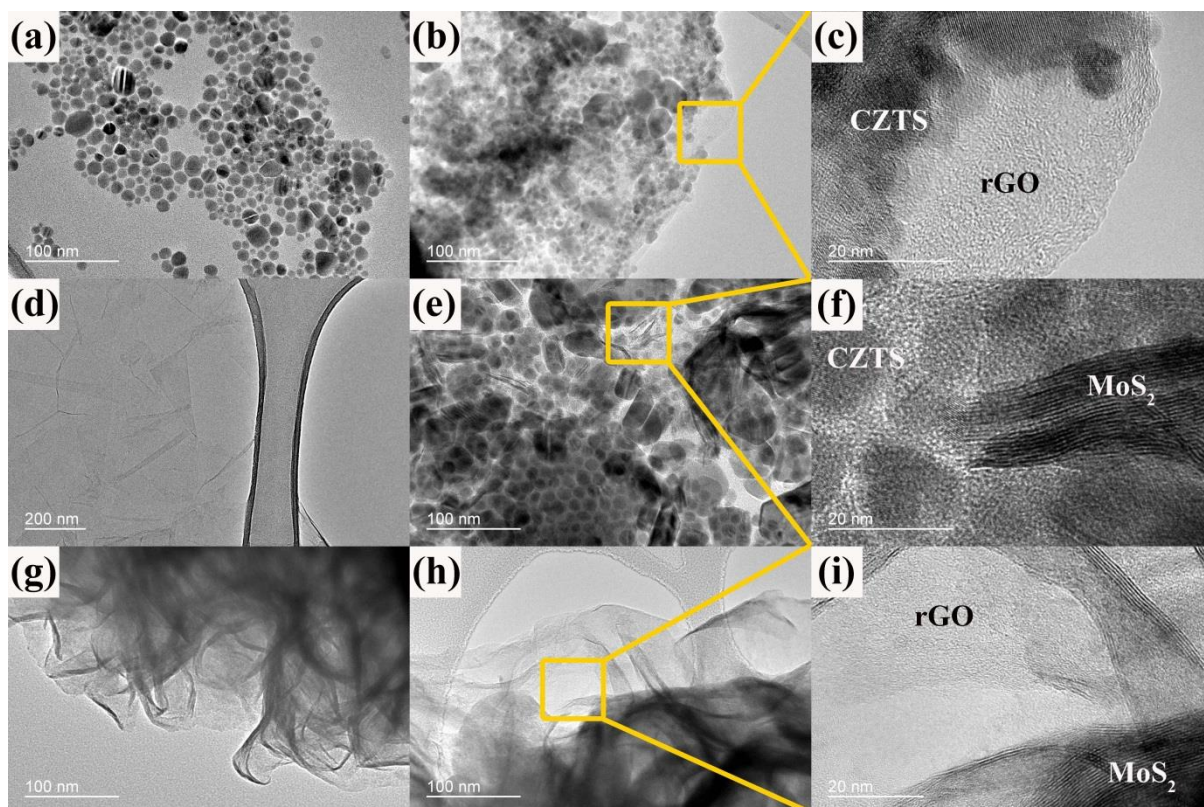

**Figure S4** TEM images of (a) CZTS, (b) CZTS/rGO, (d) graphene oxide, (e) CZTS/MoS<sub>2</sub>, (g) MoS<sub>2</sub>, and (h) MoS<sub>2</sub>-rGO. High-resolution TEM images of (c) CZTS/rGO, (f) CZTS/MoS<sub>2</sub>, and (i) MoS<sub>2</sub>-rGO.

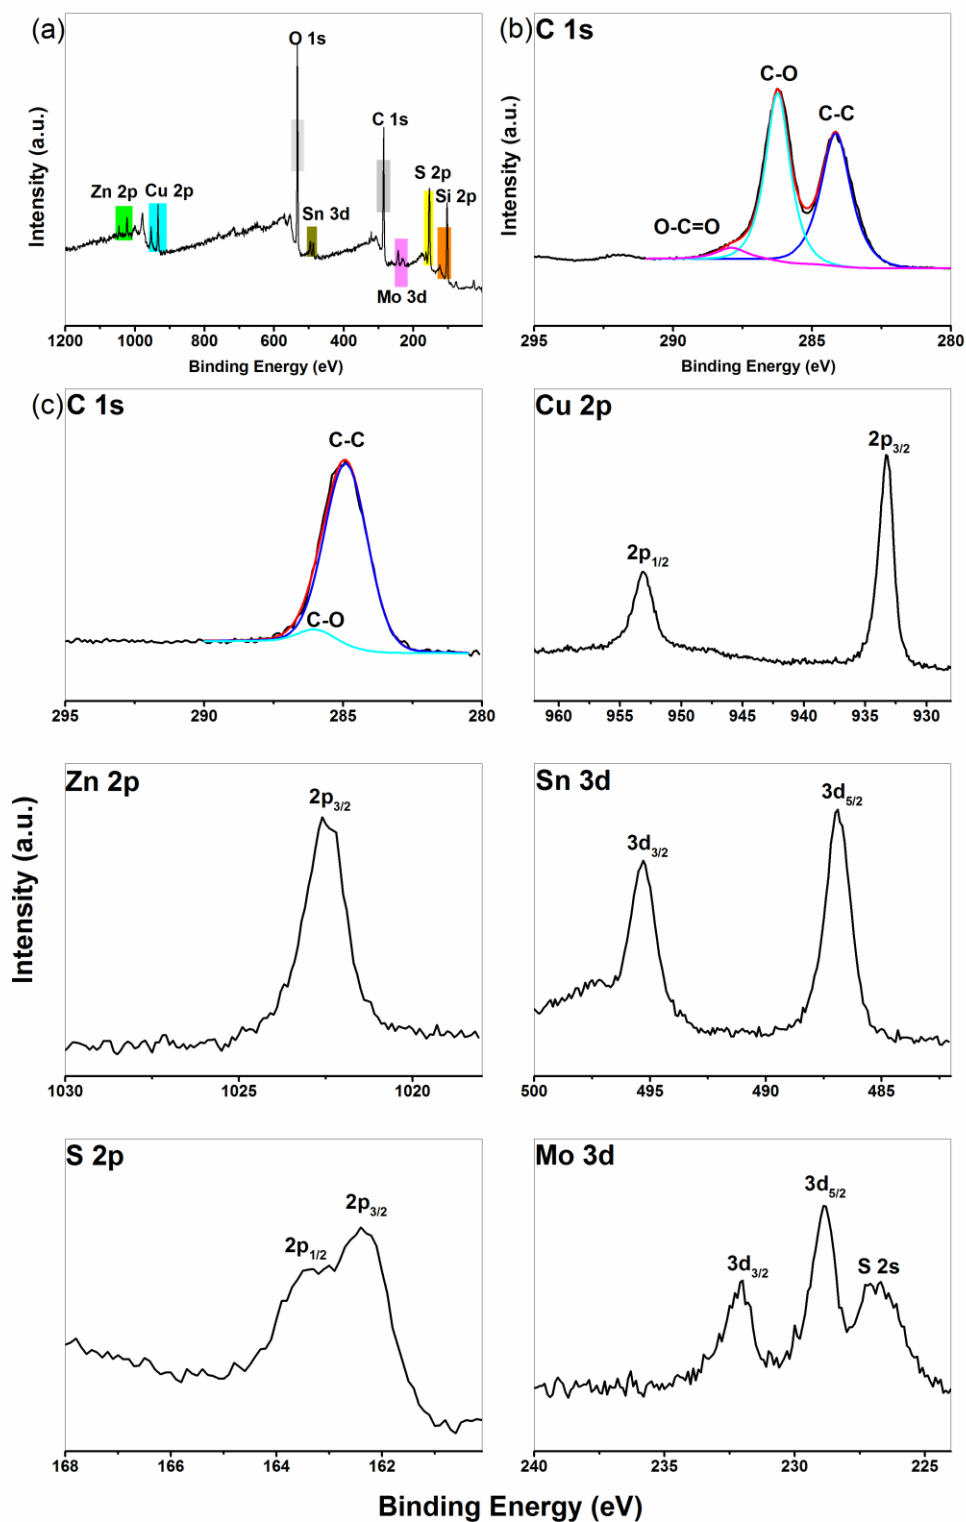

**Figure S5** (a) XPS survey spectrum of CZTS/MoS<sub>2</sub>-rGO heterostructure. The signal of oxygen and silicon is mainly from the SiO<sub>2</sub> substrate. (b) High-resolution XPS spectrum of C 1s region from graphene oxide and (c) high-resolution XPS analyses for individual elements in CZTS/MoS<sub>2</sub>-rGO heterostructure.

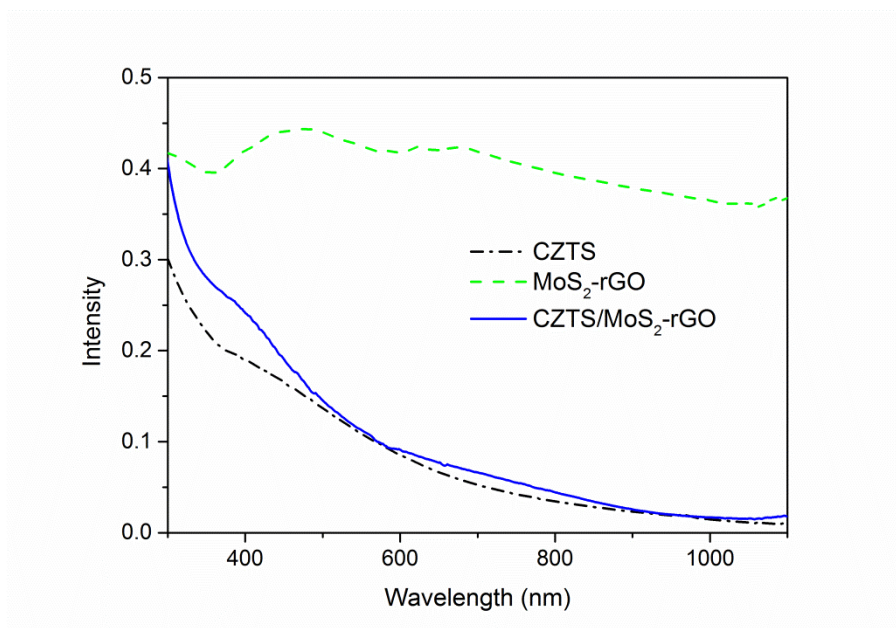

**Figure S6** UV-Vis spectra of CZTS, MoS<sub>2</sub>-rGO, and CZTS/MoS<sub>2</sub>-rGO.

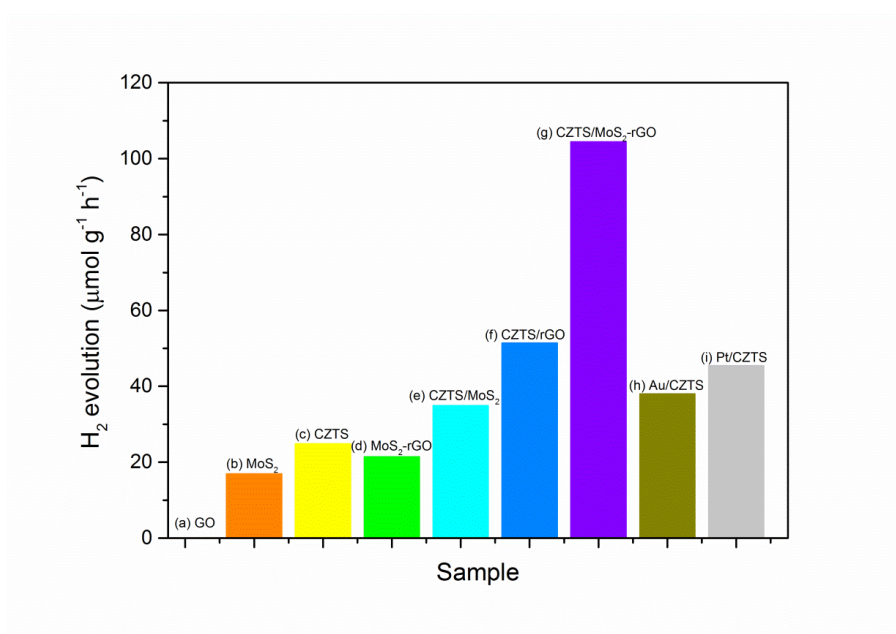

**Figure S7** Comparison of the photocatalytic H<sub>2</sub> evolution rates of various photocatalysts. (a) GO, (b) MoS<sub>2</sub>, (c) CZTS, (d) MoS<sub>2</sub>-rGO, (e) CZTS/MoS<sub>2</sub>, (f) CZTS/rGO, (g) CZTS/MoS<sub>2</sub>-rGO, (h) Au/CZTS, and (i) Pt/CZTS. Experiment conditions: 1 h irradiation by solar simulator (150 W Xe lamp, ozone free, Air Mass Filter, AM 1.5 Global) of 70 mW cm<sup>-2</sup> light intensity.

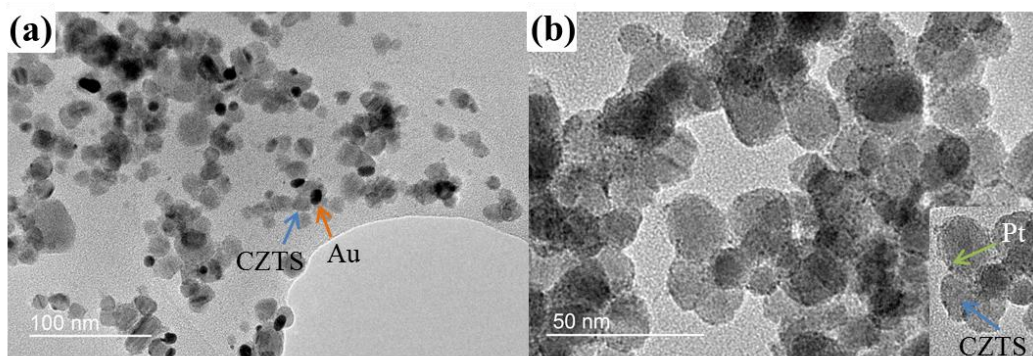

**Figure S8** TEM images of (a) Au/CZTS and (b) Pt/CZTS. Inset in (b) shows a high-resolution TEM image of Pt/CZTS.

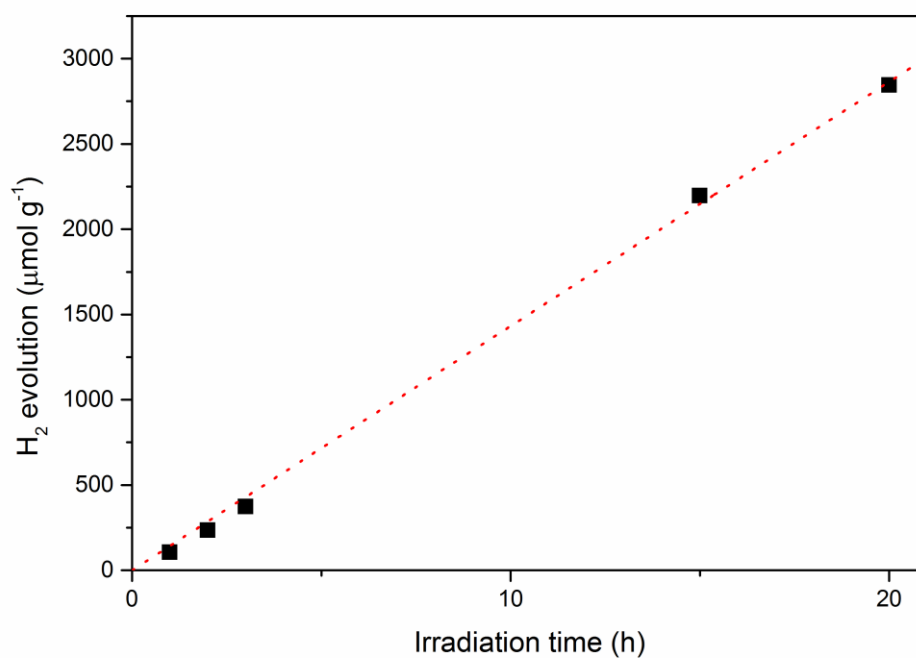

**Figure S9** Photocatalytic H<sub>2</sub> evolution by CZTS/MoS<sub>2</sub>-rGO heterostructure in a 20 h reaction. The composition of photocatalyst: 90 wt% CZTS, 9 wt% MoS<sub>2</sub>, and 1 wt% rGO.

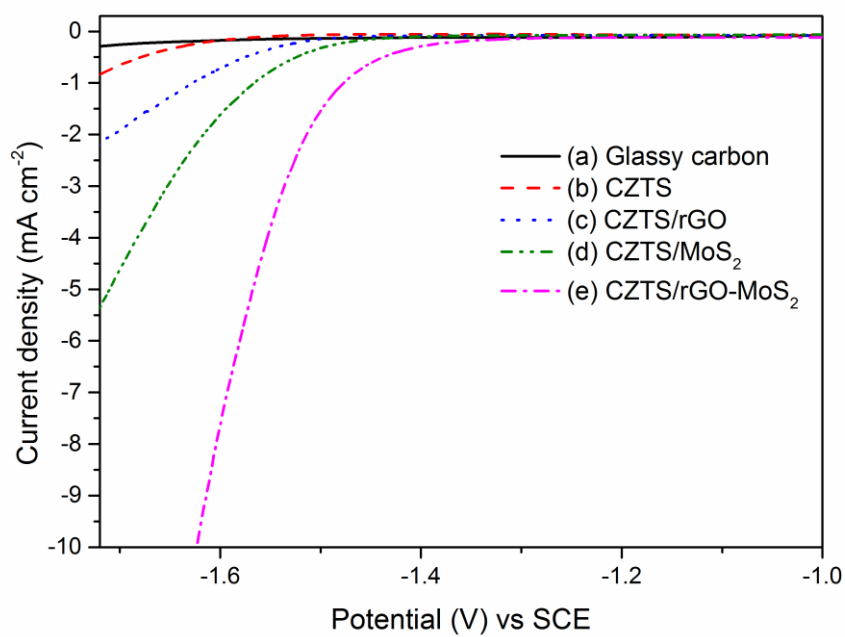

**Figure S10** Polarization curves of various samples at a cathodic scan rate of  $2 \text{ mV s}^{-1}$  in a  $\text{Na}_2\text{S}$  (0.35 M) +  $\text{Na}_2\text{SO}_3$  (0.25 M) solution: (a) glassy carbon, (b) CZTS, (c) CZTS/rGO, (d) CZTS/MoS<sub>2</sub>, and (e) CZTS/MoS<sub>2</sub>-rGO heterostructure.
